# Supplementary material for: Genomic Characterization of Clinical Stenotrophomonas Strains from Thailand Reveals Five Novel Species and Extensive Functional Diversity
Source: Research Square preprint supplement (doi:10.21203/rs.3.rs-7688735/v1), 2025-11-03
Supplement: Supplementary file 1 [file b3d8b3d6a580289e4ffdb975.docx]

**Supplementary data**

**Discovery of Potential Novel *Stenotrophomonas* Species Based on Whole-Genome Phylogeny and Comparative Genomics**

**Table S1.** Genomic features of ten putative novel *Stenotrophomonas* species

| **Isolate code** | **No of Contigs**  **(≥ 200 bp)** | **Largest contigs** | **Total length** | **N50** | **L50** | **GC(%)** | **No of CDS** | **No of gene** |
| --- | --- | --- | --- | --- | --- | --- | --- | --- |
| PSU-St7 | 43 | 764333 | 4825965 | 438616 | 5 | 66.18 | 4493 | 4493 |
| PSU-St10 | 15 | 3451753 | 4357180 | 3451753 | 1 | 66.62 | 4475 | 4475 |
| PSU-St15 | 14 | 3290482 | 4484310 | 3290482 | 1 | 66.52 | 4158 | 4158 |
| PSU-St19 | 28 | 613718 | 4584980 | 365739 | 5 | 66.44 | 4178 | 4178 |
| PSU-St22 | 54 | 731392 | 5021672 | 261484 | 7 | 66.02 | 4750 | 4750 |
| PSU-St83 | 20 | 1055045 | 4110911 | 707856 | 3 | 66.84 | 3707 | 3707 |
| PSU_St99 | 34 | 897578 | 4624572 | 474764 | 4 | 66.47 | 4238 | 4238 |
| PSU_St103 | 58 | 539539 | 4731594 | 264952 | 7 | 66.13 | 4443 | 4443 |
| PSU_St142 | 46 | 825518 | 4972963 | 368399 | 5 | 66.05 | 4679 | 4679 |
| PSU_St154 | 42 | 928099 | 5050955 | 462045 | 4 | 66.09 | 4720 | 4720 |

**Table S2.** Degree of biofilm production of potential novel *Stenotrophomonas* strains

| **Isolate code** | **Mean OD** | **Biofilm level** |
| --- | --- | --- |
| PSU-St7 | 0.2944 | Strong |
| PSU-St10 | 0.1718 | Moderate |
| PSU-St15 | 0.2671 | Strong |
| PSU-St19 | 0.2552 | Strong |
| PSU-St22 | 0.5679 | Strong |
| PSU-St83 | 0.1637 | Moderate |
| PSU-St99 | 0.2238 | Moderate |
| PSU-St103 | 0.2058 | Moderate |
| PSU-St142 | 0.3274 | Strong |
| PSU-St154 | 0.2913 | Strong |

(ODc (Mean+3SD): 0.059, 2*ODc :0.118, 4* ODc : 0.236)


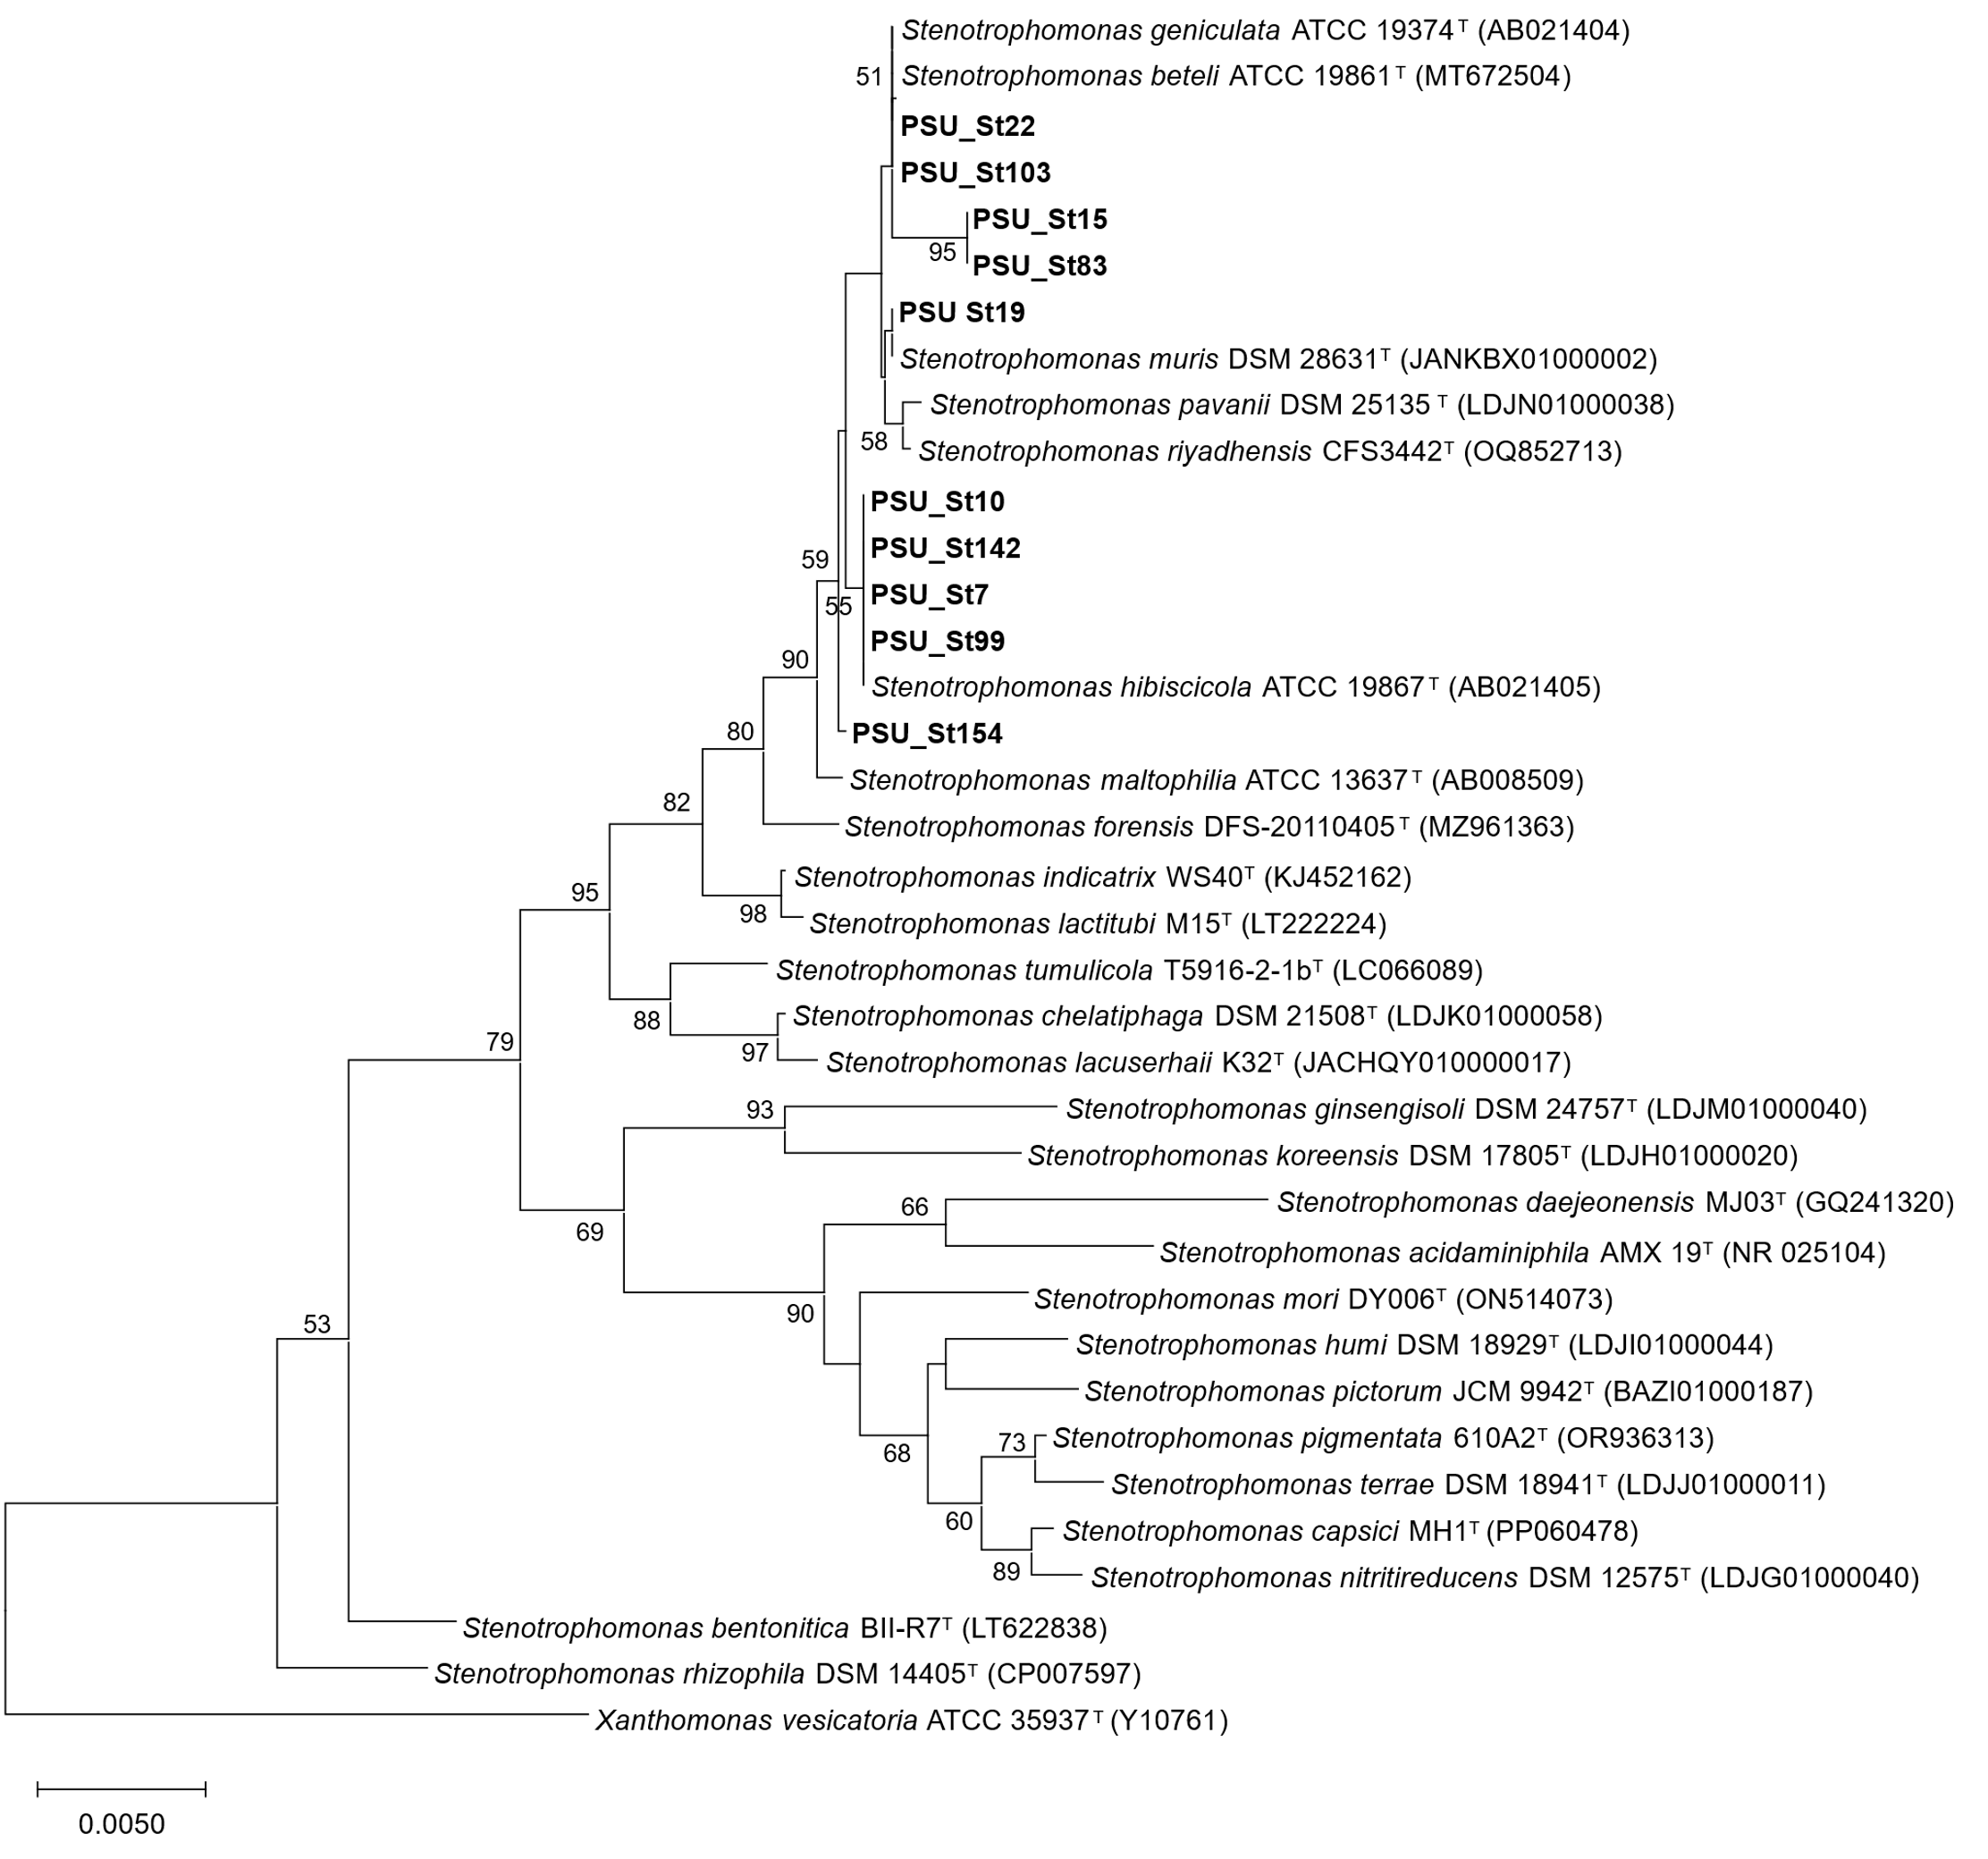


**Figure S1**Neighbour-joining tree based on 16S rRNA gene sequences showing the relationship between PSU strains and closely related *Stenotrophomonas*. All positions containing gaps and missing data were eliminated. There were a total of 1334 positions in the final dataset. Bootstrap values (>50 %) based on 1000 replicates are shown at branch nodes. *Xanthomonas vesicatoria* ATCC 35937T was used as the outgroup. Bar, 0.005 nucleotide substitution rate (K*nuc*) units.


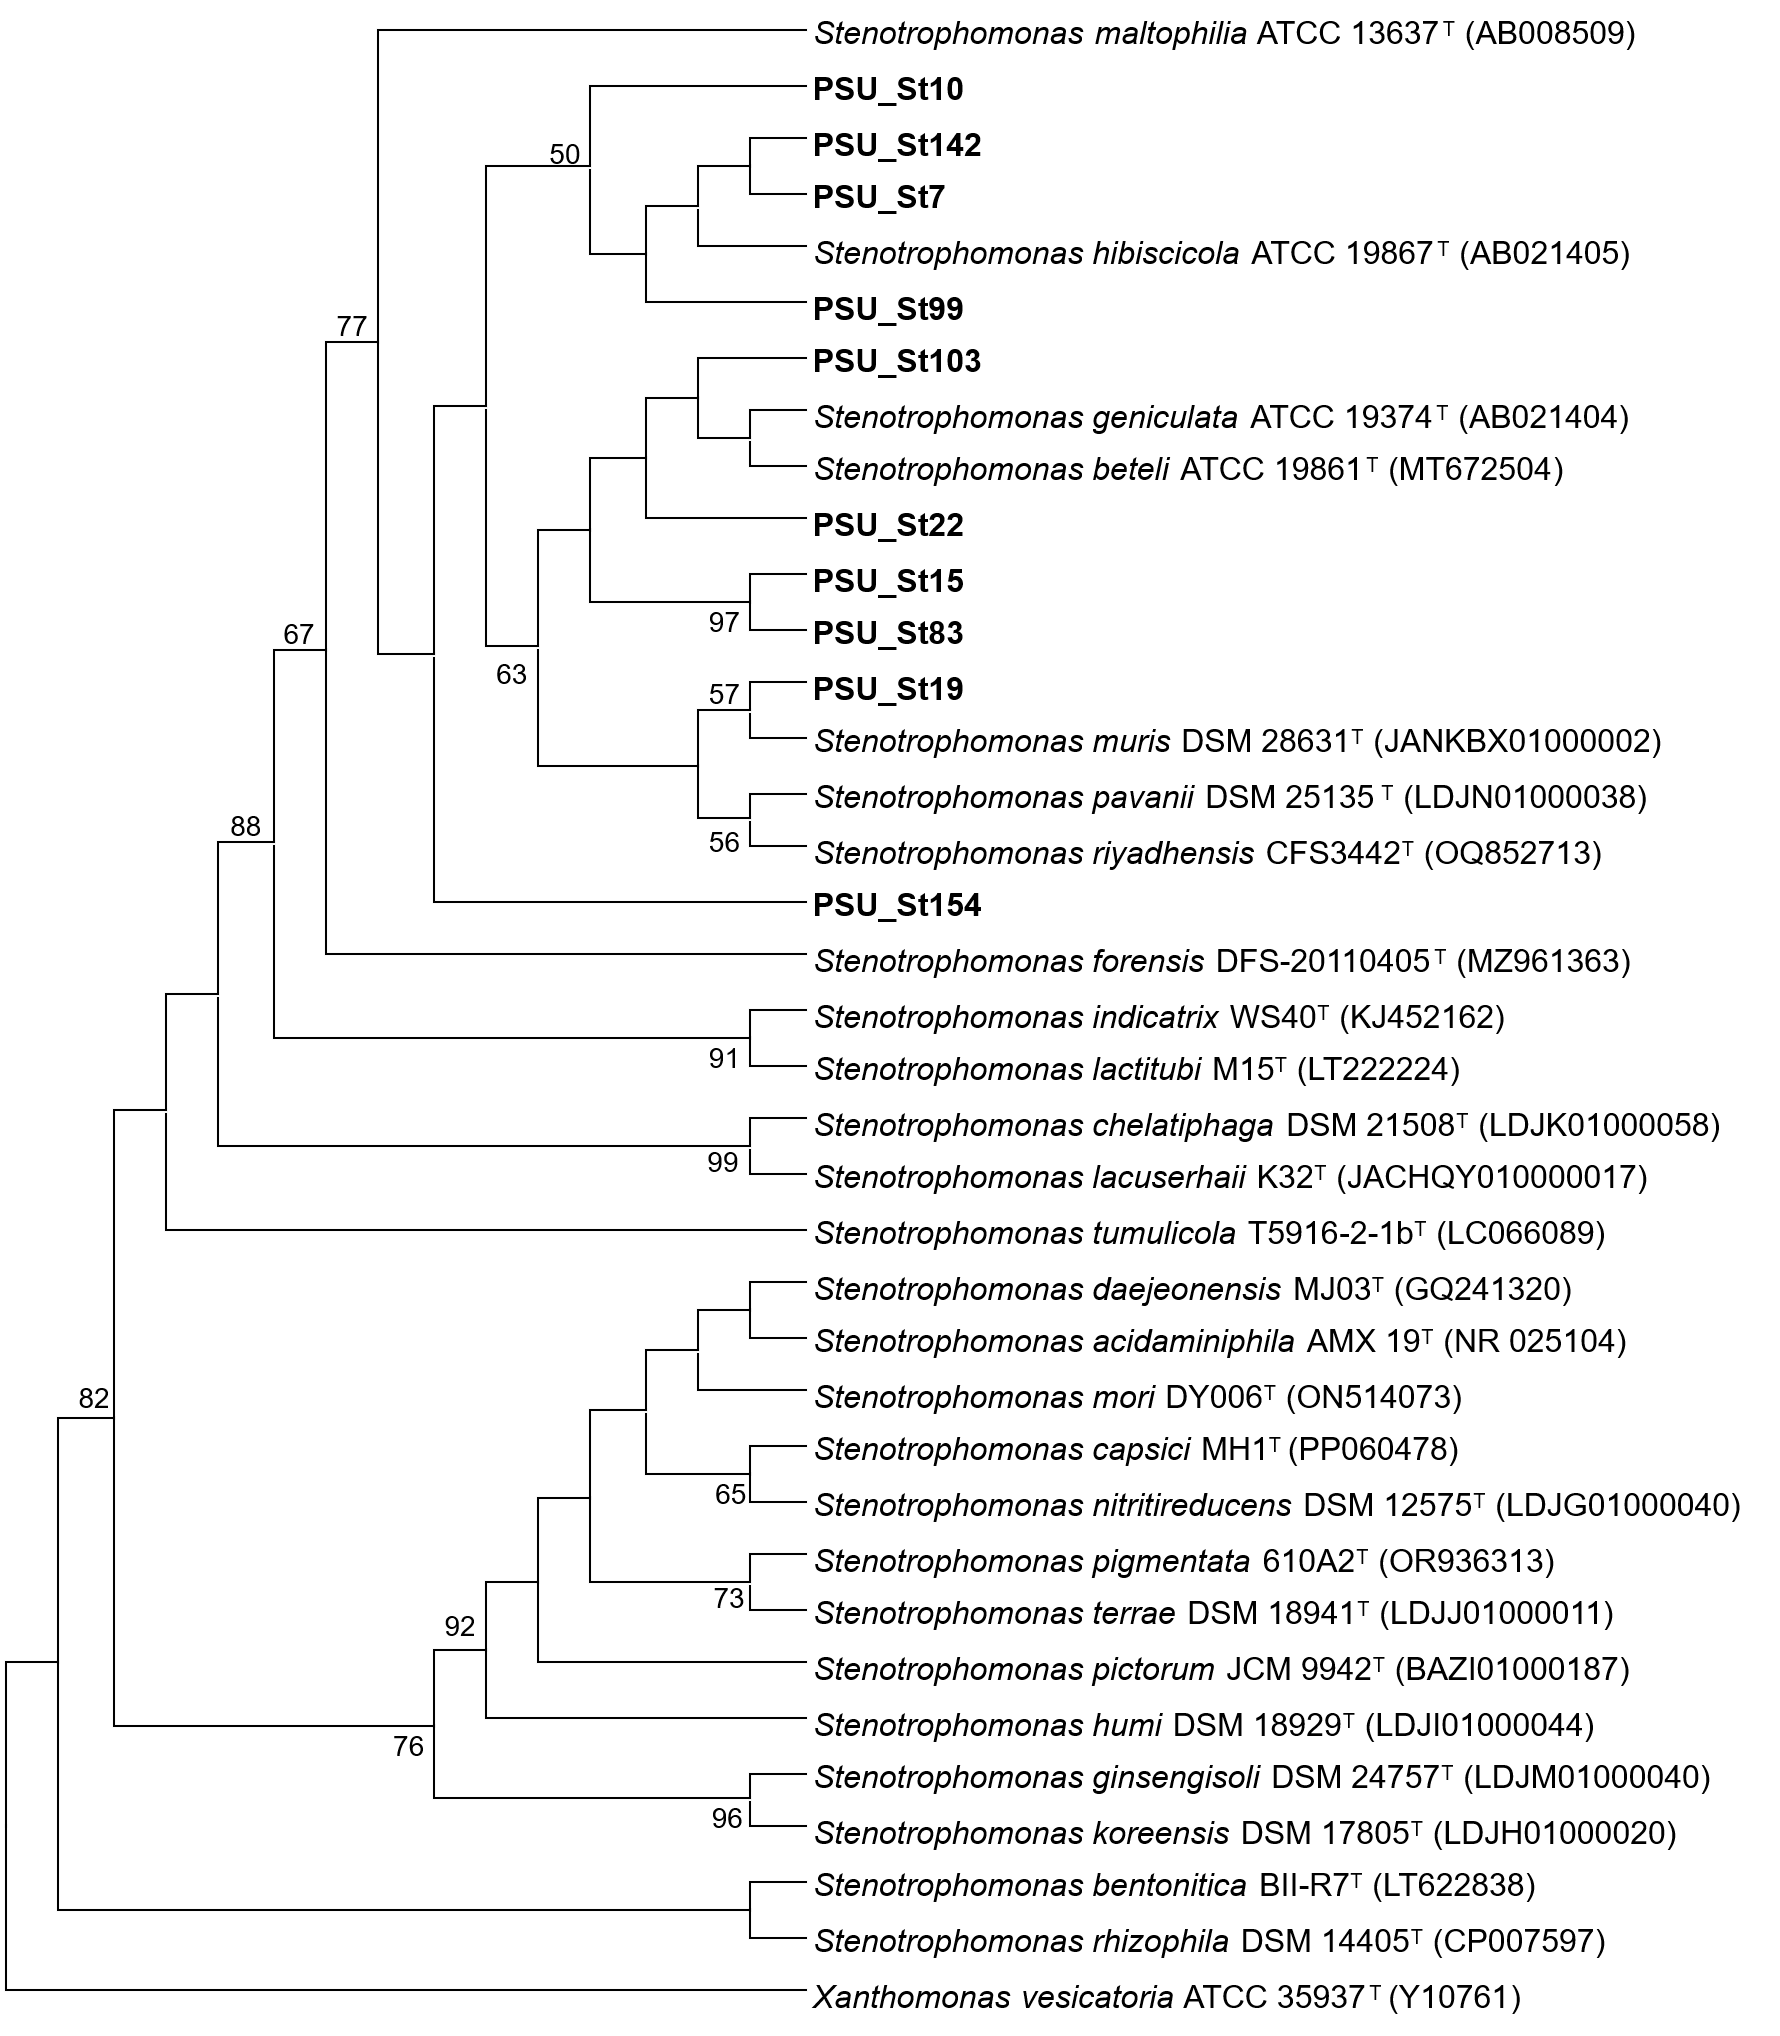


**Figure S2** Maximum-parsimony phylogenetic tree based on 16S rRNA gene sequences showing the relationship between PSU strains and closely related *Stenotrophomonas* species. All positions containing gaps and missing data were eliminated. There were a total of 1334 positions in the final dataset. *Xanthomonas vesicatoria* ATCC 35937T was used as an outgroup. Bootstrap values >50 % (based on 1000 replications) are shown at branch points.

**
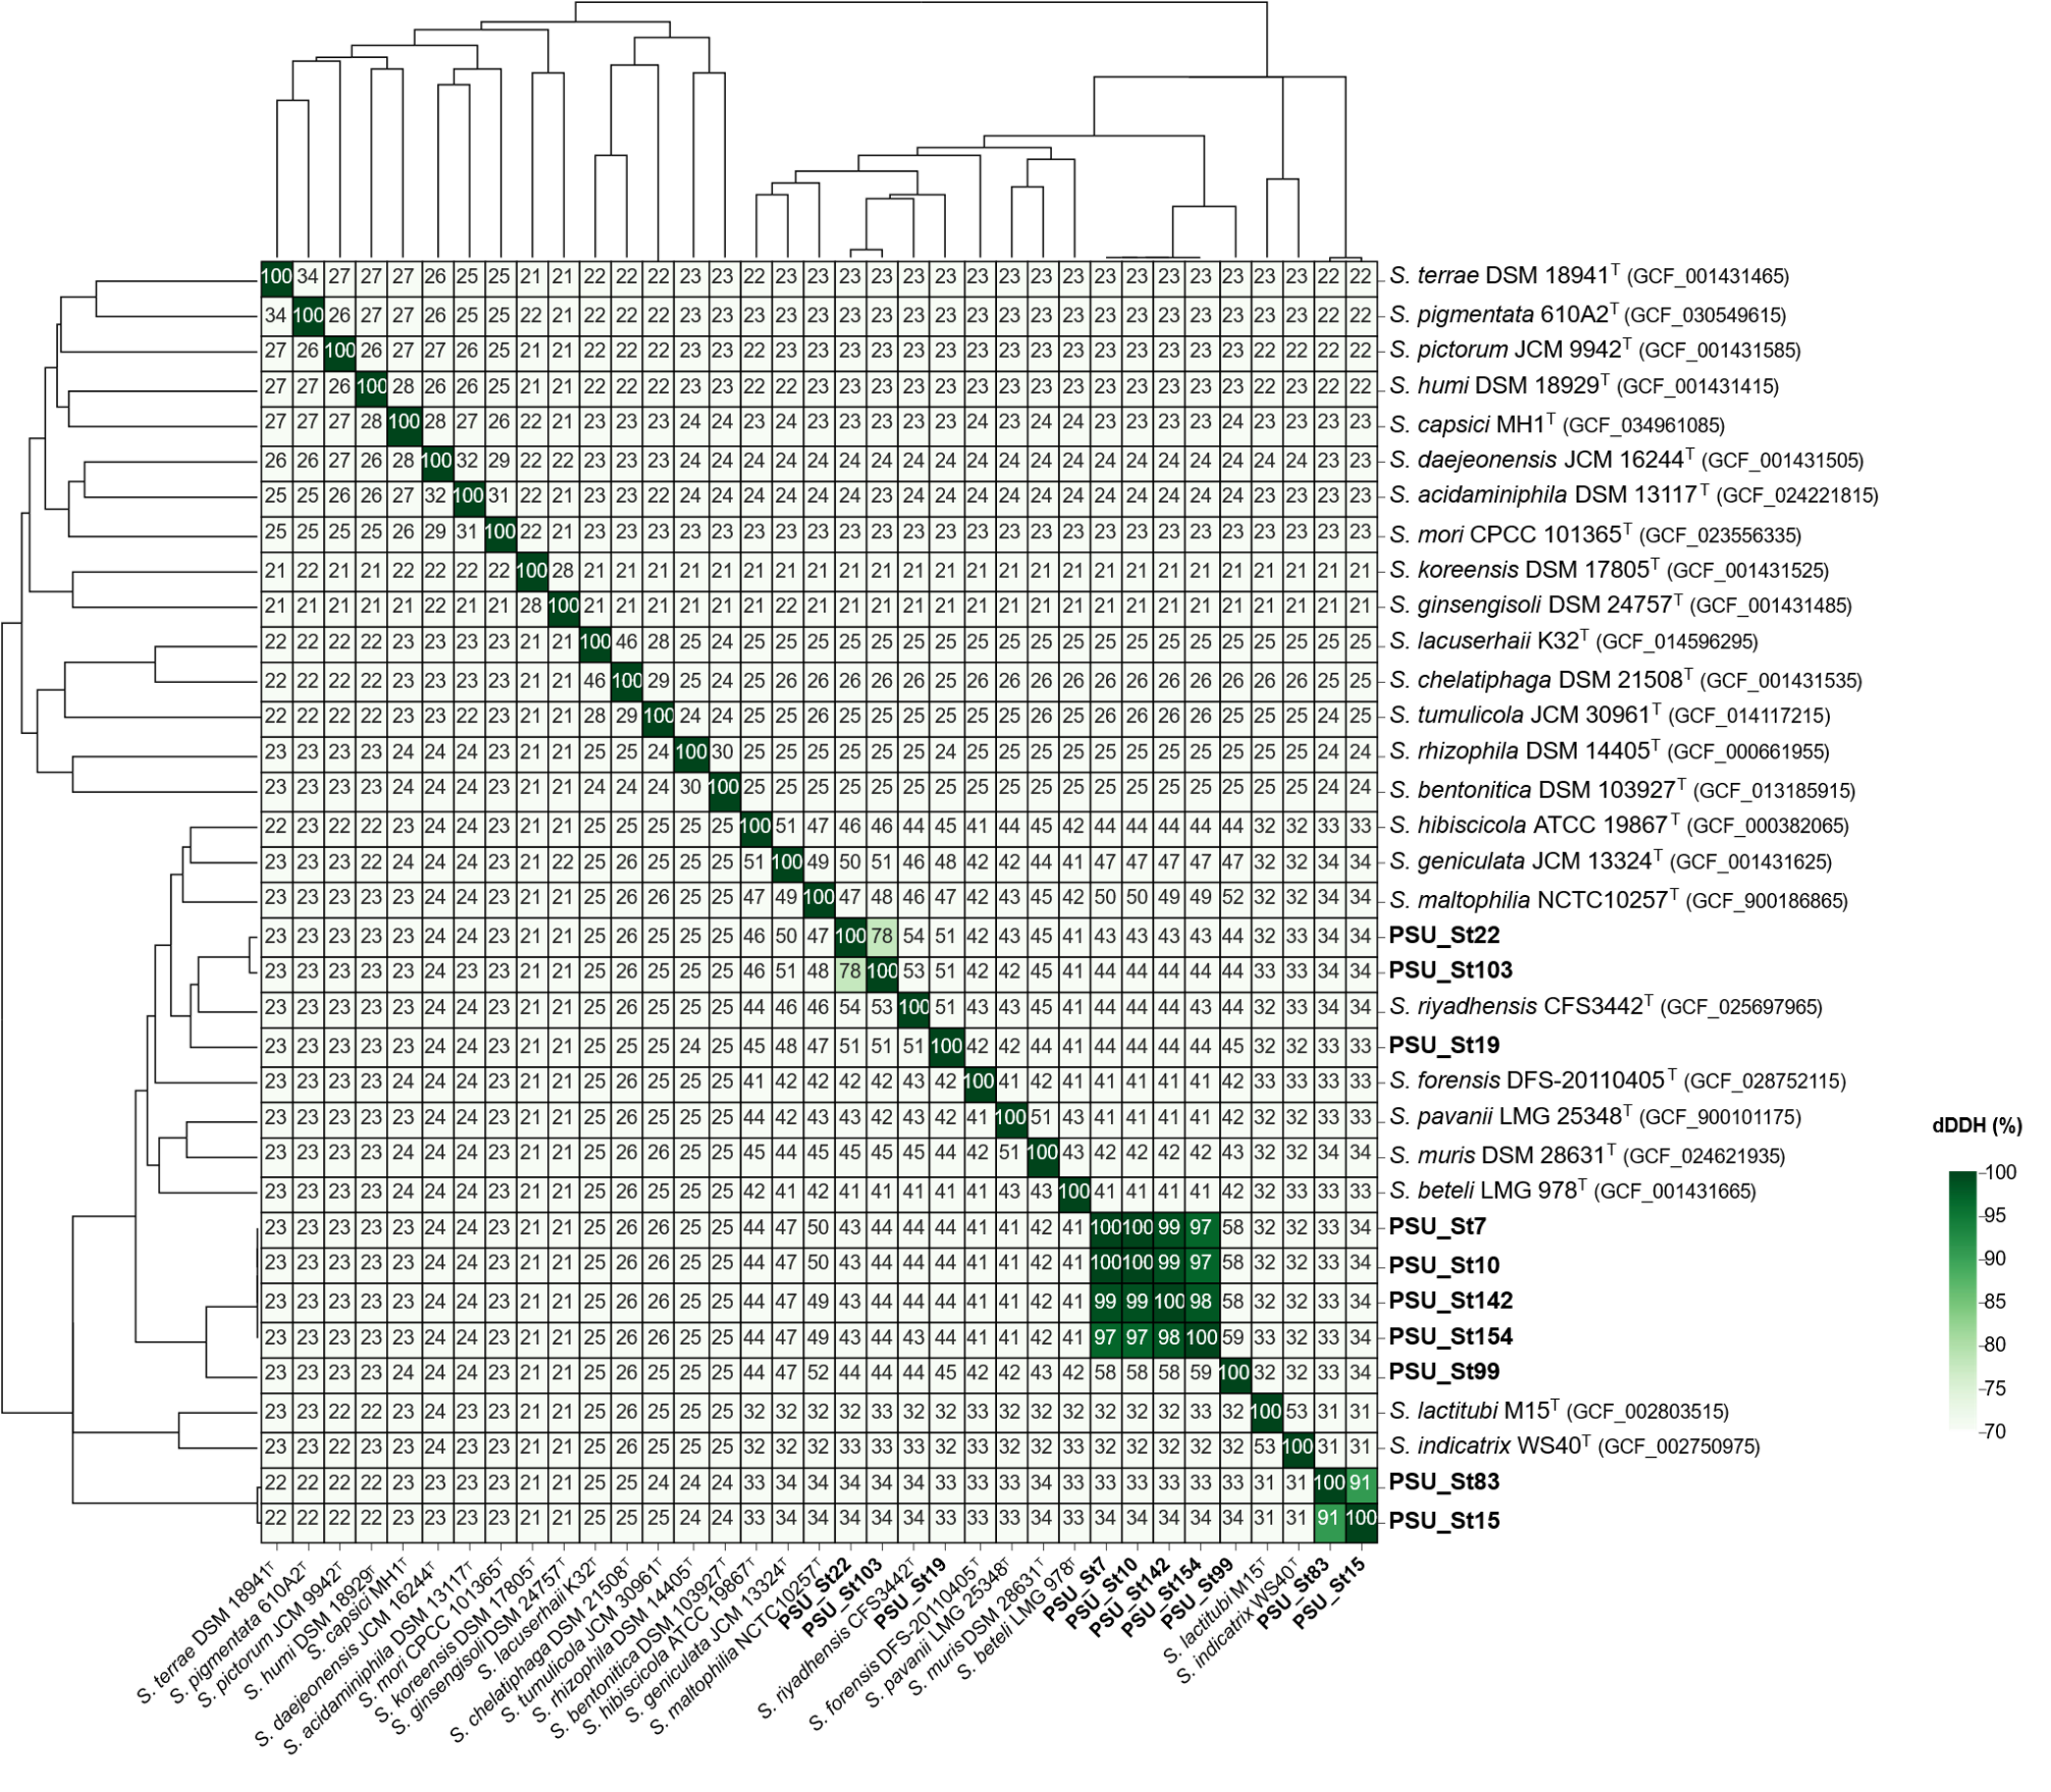
**

**Figure S3** Digital DNA-DNA hybridization (dDDH) pairwise comparison heatmap.


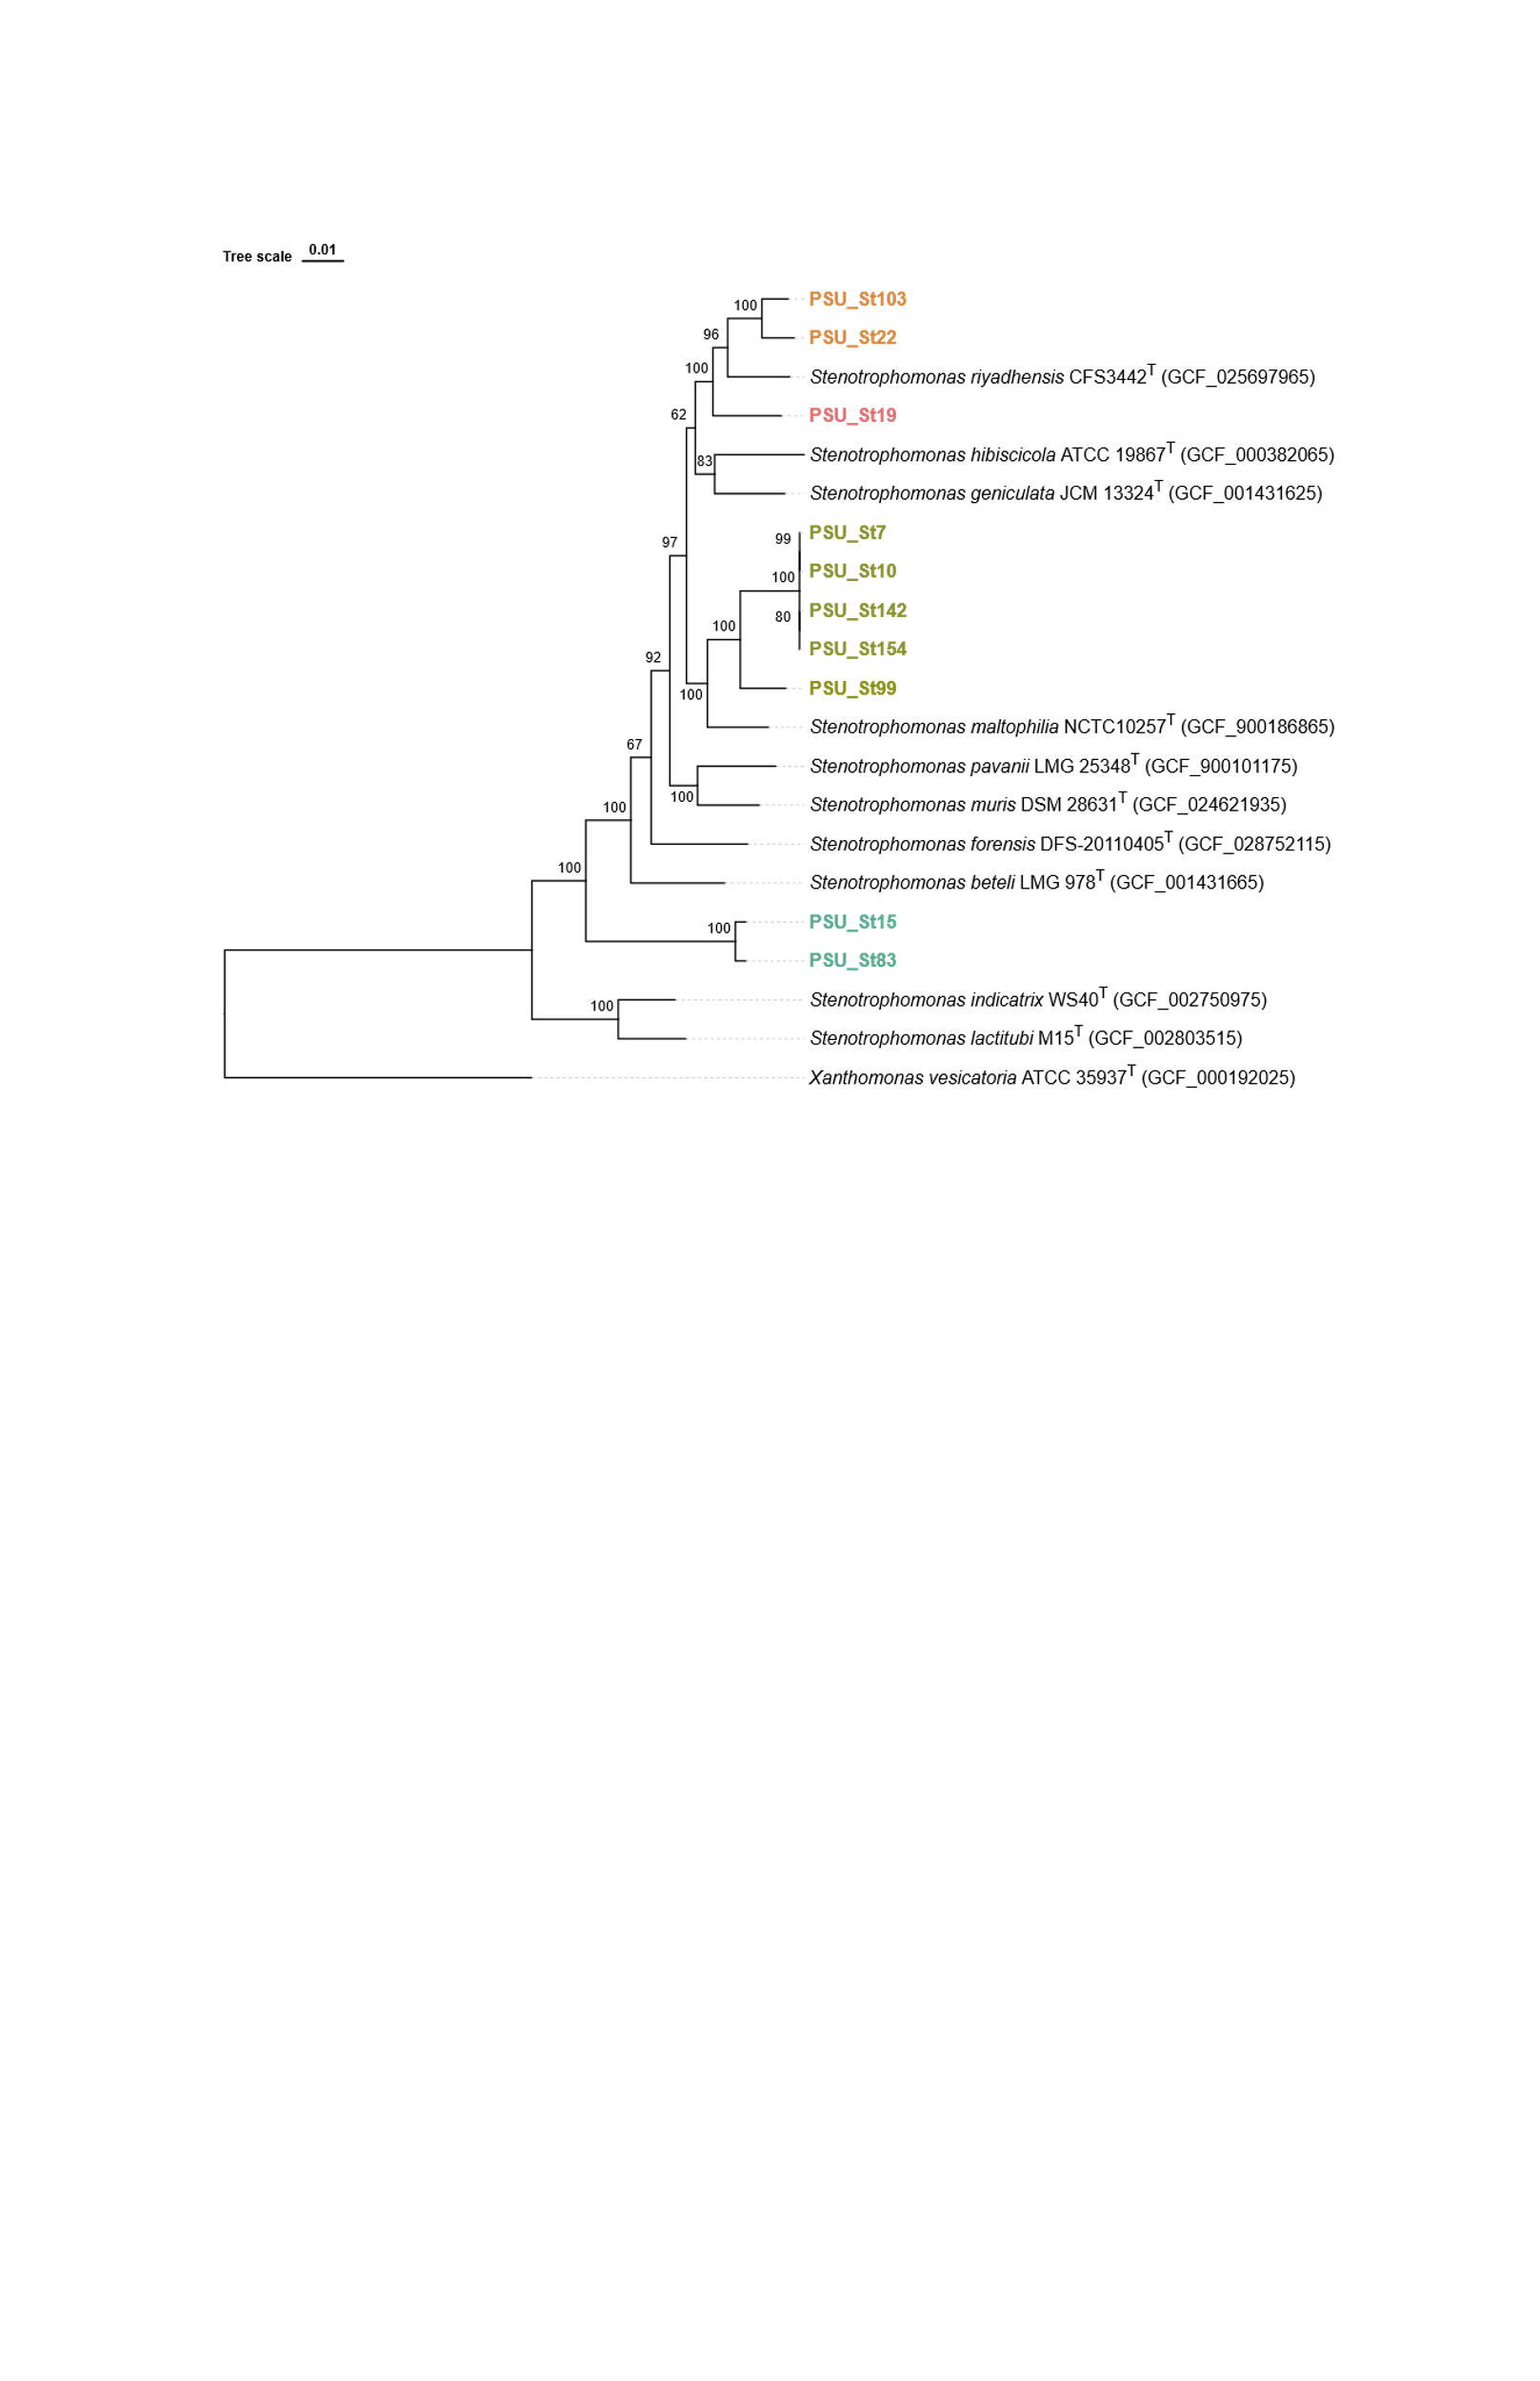


**Figure S4** Phylogenetic analysis between PSU strains and closely related *Stenotrophomonas* species. The phylogenetic tree was constructed using multi-locus sequence alignment generated based on 100 housekeeping genes using autoMLST. The Bootstrap values above 70 were indicated above the branch points. The scale bar corresponded to 1% genetic variation for the length of the scale.

**Figure S5** COG distribution of genes classified by BPGA between PSU strains and closely related *Stenotrophomonas* species.
